# Supplementary material for: Geese Reared in Vineyard: Soil, Grass and Animals Interaction
Source: MDPI journal article supplement (doi:10.3390/ani9040179), 2019-04-19
Supplement: s1 [file s1]

**Table S1.** Morphological description by Schoeneberger *et al.* (2012) of the profiles of the vineyard soils with a High (HGD) and Low (LGD) Geese Density, and of the soil of the control vineyard Without Geese (WG), Cannara (PG, central Italy).

Landform, hill; Exposure, S-SE; Slope, 5%; Altitude, 250 m a.s.l. Mean annual air temperature: 14.8°C; Mean annual precipitation, 79.4 mm; Parent material, fluvial and lacustrine sediments; Soil classification, mixed, calcareous, mesic Typic Haplustept (Soil Survey Staff, 2014).

| Soil use | Horizons | Depth /cm | Colour <sup>a</sup> | Texture <sup>b</sup> | Skeleton <sup>c</sup> /% | Structure <sup>d</sup> | Consistency <sup>e</sup> | Plasticity <sup>f</sup> | Roots <sup>g</sup> | Boundary <sup>h</sup> | Other observations                                 |
|----------|----------|-----------|---------------------|----------------------|--------------------------|------------------------|--------------------------|-------------------------|--------------------|-----------------------|----------------------------------------------------|
| WG       | Ap1      | 0-7       | 2.5YR5/4            | sic                  | <1                       | 2fm sbk                | ns                       | p                       | 3vf,f              | cw                    | Abundant CaCO <sub>3</sub> concretions.            |
|          | Ap2      | 7-21      | 2.5YR5/4            | sac                  | <1                       | 3fm abk                | ns                       | sp                      | 3vf,f              | cs                    | Common CaCO <sub>3</sub> concretions.              |
|          | Bw       | 21-36     | 2.5YR5/4.           | sic                  | 2-3                      | 3fm abk                | s                        | p                       | 2vf,f, 1m          | cs                    | Common CaCO <sub>3</sub> and few Mn concretions.   |
|          | BC       | 36-54     | 2.5YR5/6            | sic                  | <1                       | 1fm sbk                | ns                       | p                       | 1vf                | cw                    | Abundant CaCO <sub>3</sub> and few Mn concretions. |
|          | C        | 54-64     | 2.5YR5/4            | c                    | <1                       | 1fm sbk                | -                        | -                       | 2vf,f, 1m          | cw                    | Common CaCO <sub>3</sub> and few Mn concretions.   |
|          | Cg       | 64-74+    | 2.5YR6/4            | sic                  | <1                       | 1 sbk                  | -                        | -                       | 2f                 | -                     | Common CaCO <sub>3</sub> and few Mn concretions.   |
| LGD      | Ap1      | 0-10      | 10YR4/3             | sic                  | <1                       | 3fm sbk                | ss                       | sp                      | 3m                 | cw                    | -                                                  |
|          | Ap2      | 10-20     | 7.5YR4/2            | c                    | <1                       | 2f sbk                 | ss                       | p                       | 1vf,f,m            | cw                    | -                                                  |
|          | Bw       | 20-27     | 10YR5/3             | c                    | <1                       | 2m abk                 | s                        | p                       | 2vf,f              | cw                    | -                                                  |

|     |     |        |          |     |    |         |    |    |                    |    |                                                    |
|-----|-----|--------|----------|-----|----|---------|----|----|--------------------|----|----------------------------------------------------|
|     | BC1 | 27-44  | 10YR5/6  | c   | <1 | 2m abk  | vs | vp | 2vf,f; 1m          | cs | Few Mn concretions and reddish streaks (7.5 YR5/6) |
|     | BC2 | 44-54  | 10YR6/4  | sac | -  | 2m abk  | s  | p  | 2f,m; 1co          | cs | Few Mn concretions and reddish streaks (7.5 YR5/6) |
|     | C   | 54-69+ | 10YR 5/4 | sic | -  | 1m sbk  | vs | vp | 1 vf,f,m,co        | -  | -                                                  |
| HGD | Ap1 | 0-6    | 10YR 4/3 | cl  | <1 | 2f sbk  | ss | p  | 1vf,f              | cs | -                                                  |
|     | Ap2 | 6-15   | 10YR 4/2 | cl  | <1 | 2fm sbk | ss | p  | 1f 1co             | cs | -                                                  |
|     | Bw1 | 15-29  | 10YR 5/4 | cl  | <1 | 2fm sbk | ss | p  | 2 vf,f,m           | cs | -                                                  |
|     | Bw2 | 29-41  | 10YR 5/4 | c   | <1 | 2m sbk  | vs | vp | 1 vf,f             | cs | -                                                  |
|     | Bw3 | 41-54  | 10YR 5/4 | c   | 1  | 1m sbk  | vs | vp | 3vf,f; 2m          | cs | -                                                  |
|     | C   | 54-70+ | 10YR 5/4 | c   | 90 | 1f sbk  | -  | -  | 2v <sub>1</sub> vf | -  | -                                                  |

<sup>a</sup> moist and crushed, according to the Munsell Soil Colour Charts.

<sup>b</sup> sic, silty clay; sac, sandy clay; cl, clay loam; c, clay.

<sup>c</sup> volume percent of particles > 2 mm.

<sup>d</sup> 1 = weak, 2 = moderate, 3 = strong; f = fine, m = medium, c = coarse; cr = crumb, abk = angular blocky, sbk = subangular blocky.

<sup>e</sup> m=moist, fr=friable, fi=firm; w=wet, ns=not sticky, ss=slightly sticky, s=sticky, vs=very sticky.

<sup>f</sup> w=wet, np=not plastic, sp=slightly plastic, p=plastic, vp=very pastic, .

<sup>g</sup> 0 = absent, v<sub>1</sub> = very few, 1 = few, 2 = plentiful, 3 = abundant; vf = very fine, f = fine, m = medium, co = coarse.

<sup>h</sup> c = clear; w = wavy, s = smooth.
